# Supplementary material for: H-NS is a bacterial transposon capture protein
Source: PubMed Central journal article supplement (PMC11335895; doi:10.1038/s41467-024-51407-5), 2024-08-20
Supplement: 41467_2024_51407_MOESM1_ESM.pdf [file 41467_2024_51407_MOESM1_ESM.pdf]

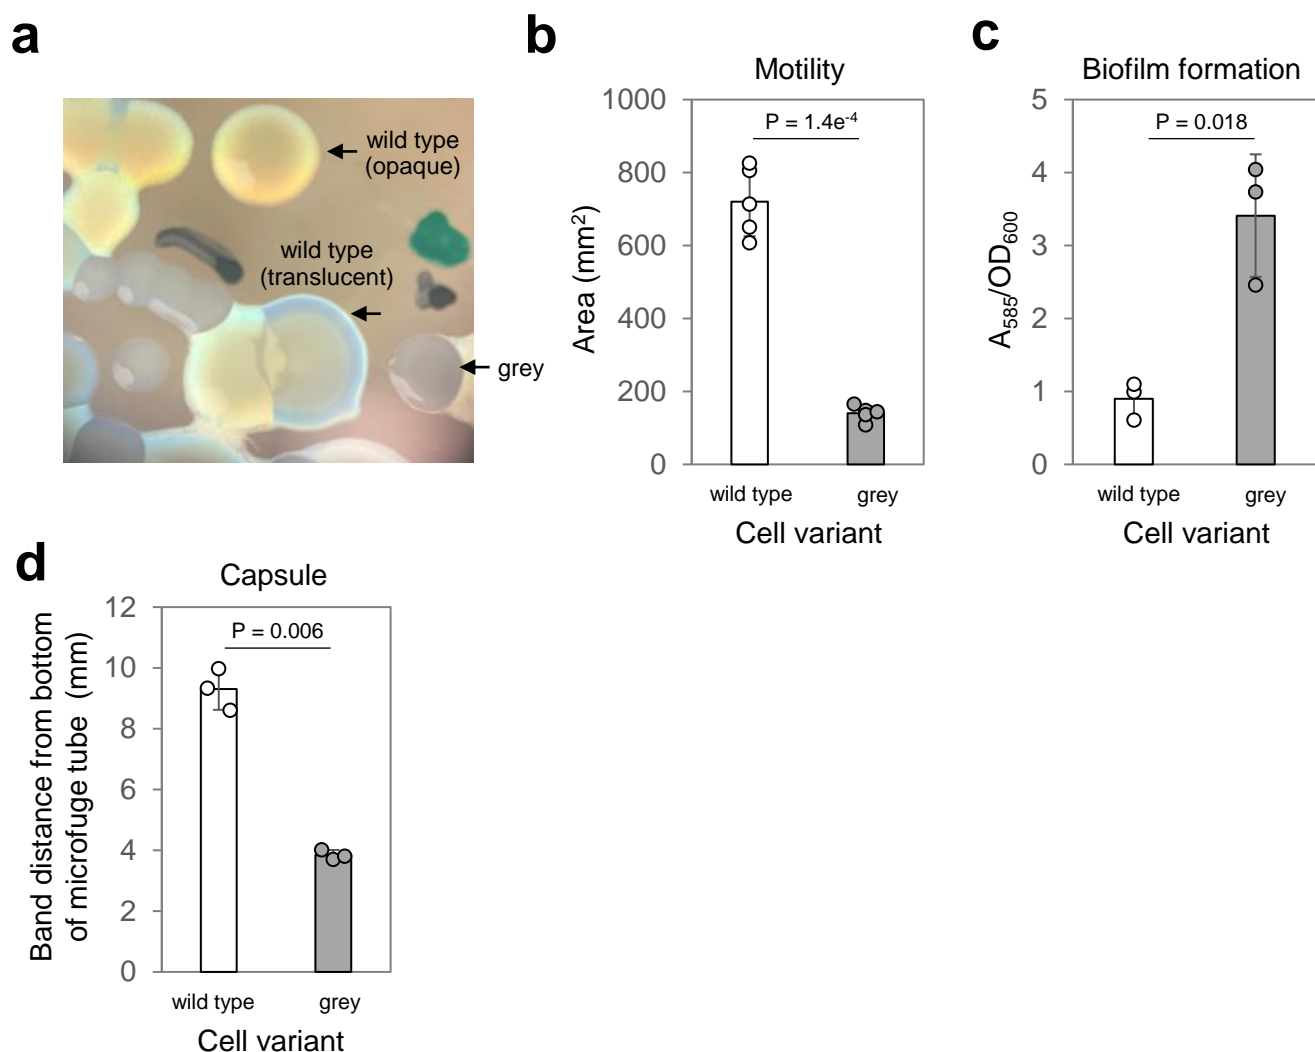

**Figure S1: Phenotypic properties of grey colony variants.**

**a. Grey colony variants are easily distinguished by avirulent translucent colony types.** A section of an agar plate viewed using a stereo microscope, illuminated from below with oblique lighting. Wild type *A. baumannii* are known to phase switch between virulent opaque and avirulent translucent colony types. These colony types, only discernible when viewed in this way, are notably different from grey colony variants that are easily identified with the naked eye.

**b. Grey colony variants have reduced motility.** The spread of colonies on soft agar plates was recorded photographically and the area of spread quantified. Results are the average of five biological replicates and error bars indicate standard deviation from the mean. Individual measurements are shown as discrete datapoints. A two-tailed student's t-test was used to determine P. Source data are provided as a Source Data file.

**c. Grey colony variants more readily form biofilms.** Cells forming biofilms on the surface of microfuge tubes were stained with crystal violet dye. After drying, the dye was solubilised the amount

present quantified by measuring the  $A_{585}$  signal as a function of the number of cells present adjudged by  $OD_{600}$  values. Results are the average of three biological replicates and error bars indicate standard deviation from the mean. Individual measurements are shown as discrete datapoints. A two-tailed student's t-test was used to determine P. Source data are provided as a Source Data file.

**d. Grey colony variants are defective for capsule production.** Cells separated by centrifugation in colloidal silica migrate according to the presence of capsule. Distances migrated were measured from the bottom of the microfuge tube containing the cell suspension. Results are the average of three biological replicates and error bars indicate standard deviation from the mean. Individual measurements are shown as discrete datapoints. A two-tailed student's t-test was used to determine P. Source data are provided as a Source Data file.

a

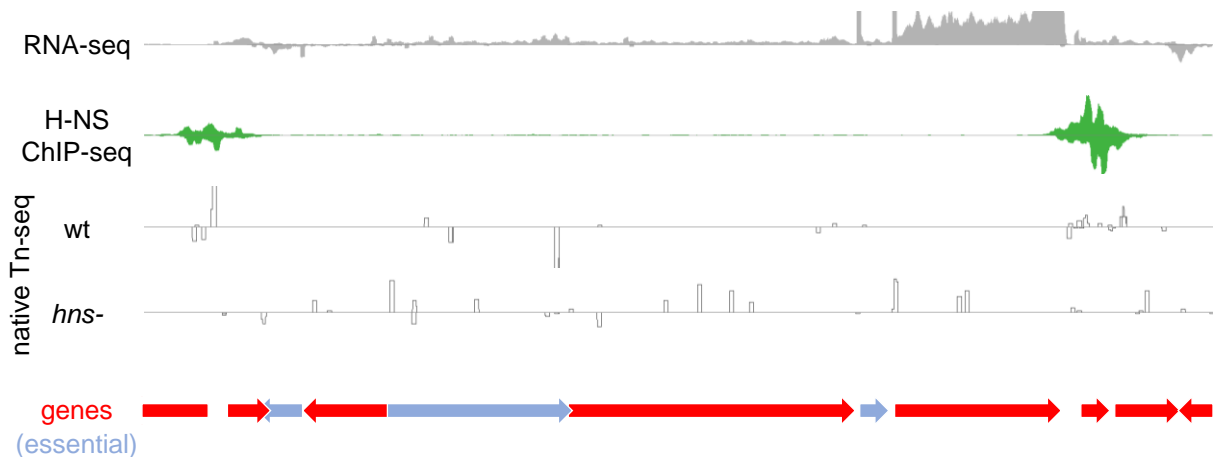

b

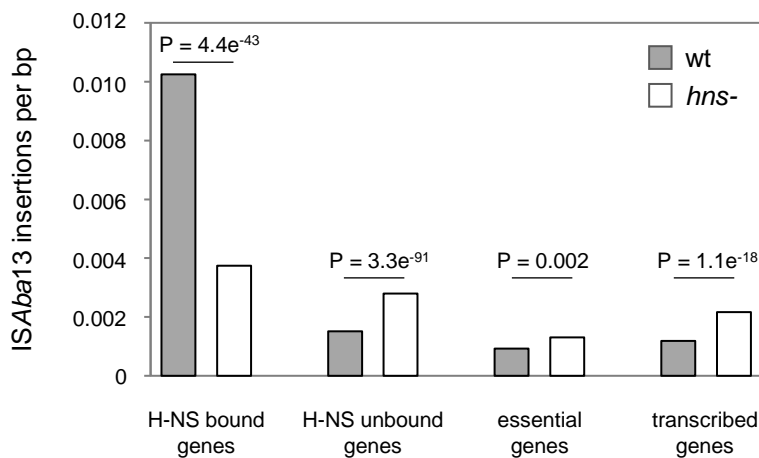

**Figure S2: H-NS protects transcribed and essential genes from disruption by *ISAbA13*.**

**a. A representative section of the *A. baumannii* chromosome showing increased transposition into essential and transcribed genes in the absence of H-NS.** Genes are shown as arrows with essential genes coloured blue. The traces show read depths from RNA-seq, H-NS ChIP-seq and native Tn-seq experiments. In all cases positive and negative values indicate read depths for the top and bottom strand respectively. The region is centred approximately around position 1,589,000 of the genome.

**b. Frequency of *ISAbA13* insertion in different classes of genes.** The bar chart shows the total number of *ISAbA13* insertions per kb, across two biological replicates, in the presence and absence of H-NS, and for H-NS bound, unbound, essential or transcribed genes. P values were derived using the student's T-test. Source data are provided as a Source Data file.

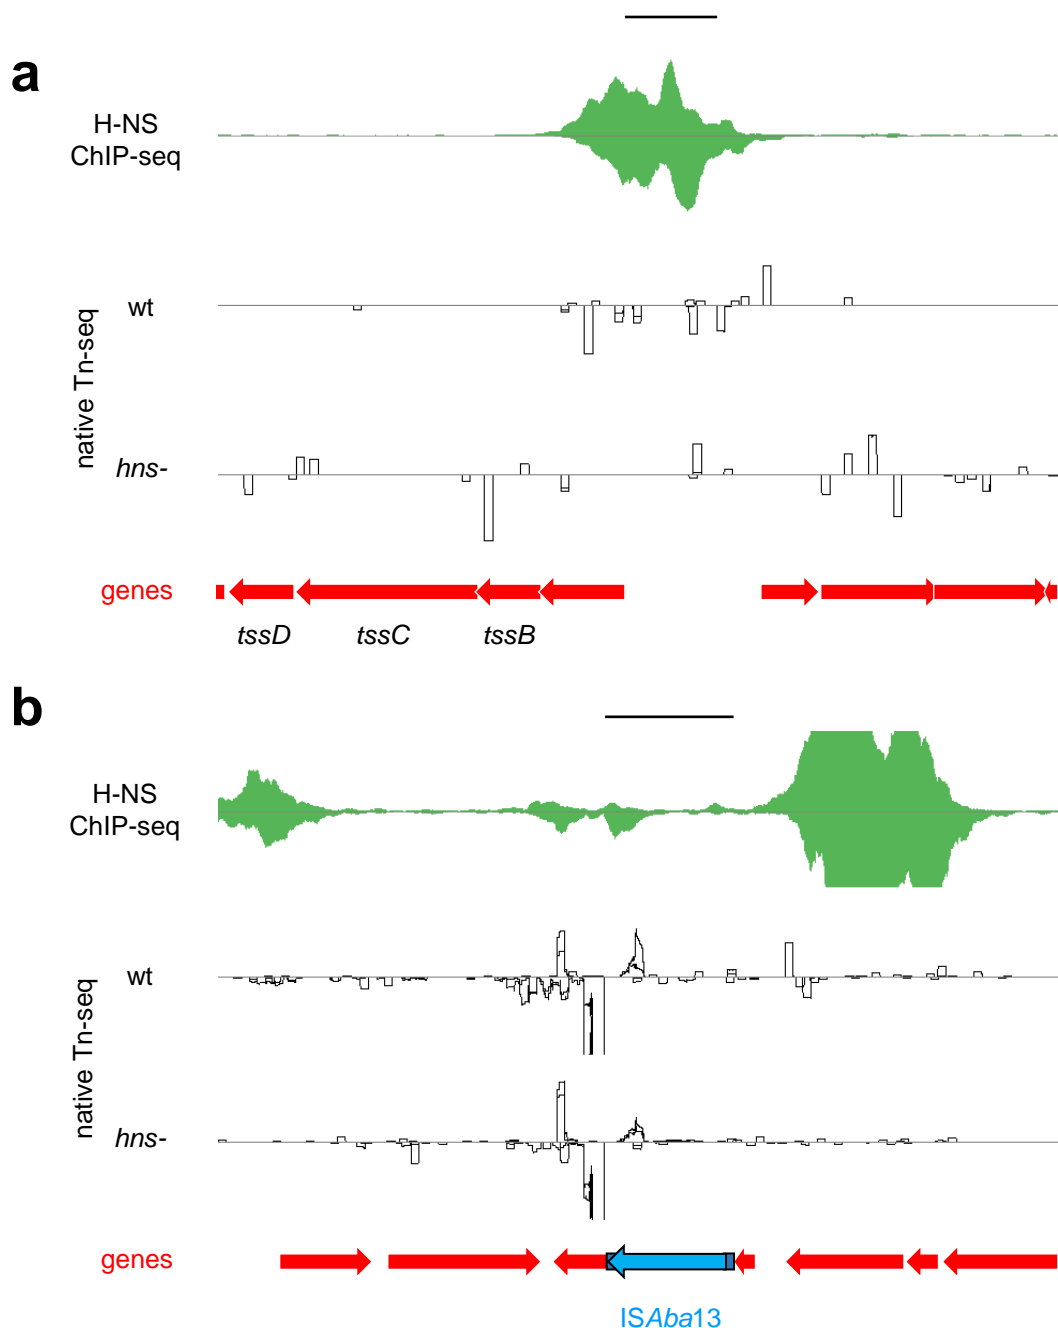

**Figure S3: Patterns of H-NS binding, and *ISAb13* transposition, upstream of DNA regions used for *in vitro* DNA bridging assays.**

**a. H-NS binding and *ISAb13* transposition patterns at the type six secretion system encoding locus.** Genes are shown as red arrows. The traces show read depths from H-NS ChIP-seq and native Tn-seq experiments. In all cases positive and negative values indicate read depths for the top and bottom strand respectively. The DNA region used for *in vitro* DNA bridging assays is indicated by the black bar.

**b. H-NS binding and *ISAb13* transposition patterns at one of the existing chromosomal copies of *ISAb13*.** As for above panel except that *ISAb13* is shown in blue.

a

```

E. coli hns           MSEALKILNNIRTLRAQARECTLETLEEMLEKLEVVVNERREEESAAAAEVEERTRKLQQ
A. baumannii hns    -----MKPDISELSVEELKRLQEEAEALIASKKD-----QAIEDAYNQ
                        :::  *  ::*  *:::  *:  *:::  ::::  :      :*

E. coli hns           YREMLIADGIDPNELLNSLAAVKSGTKAKRAQRPAKYSYVDENGETKTWTGQGRTPAVIK
A. baumannii hns    IIEIAENVGFSVEQLLEFGAQKRK----KTTRKSVEPRYRNKNNAAETWTGRGKQPRWLV
                        *:  *:.  :***:  *  :.  *  :::::  *  :*.  :****:*:  *  :

E. coli hns           KAMDEQGKSLDDFLIKQ
A. baumannii hns    AEIEK-GAKLEDFLI--
                        :::  *  .*:****

```

b

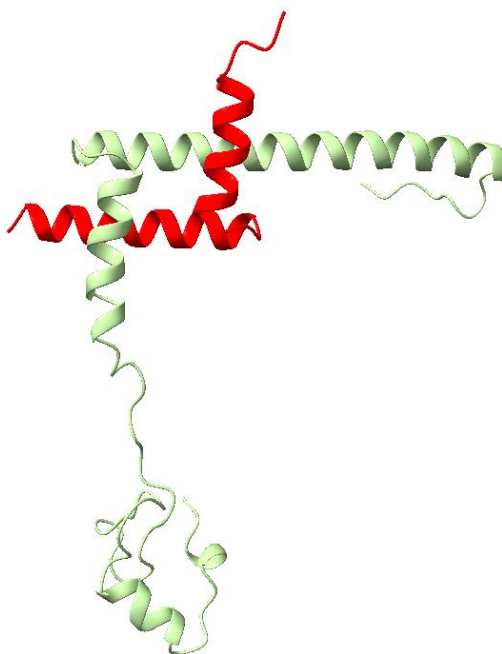

**Figure S4: Organisation of H-NS-39 and predicted interaction with full length H-NS.**

**a. Alignment of *E. coli* and *A. baumannii* H-NS.** Residues that are identical (\*), conserved (:), or semi-conserved (.) are indicated. The region of *E. coli* H-NS highlighted red is the region used by van der Valk and co-workers<sup>1</sup>. The region of *A. baumannii* H-NS highlighted red corresponds to H-NS-39 used in this work.

**b. Predicted interaction between *A. baumannii* H-NS and H-NS-39.** The structural prediction was generated using AlphaFold<sup>396</sup>. Full length H-NS is green and H-NS-39 is red.

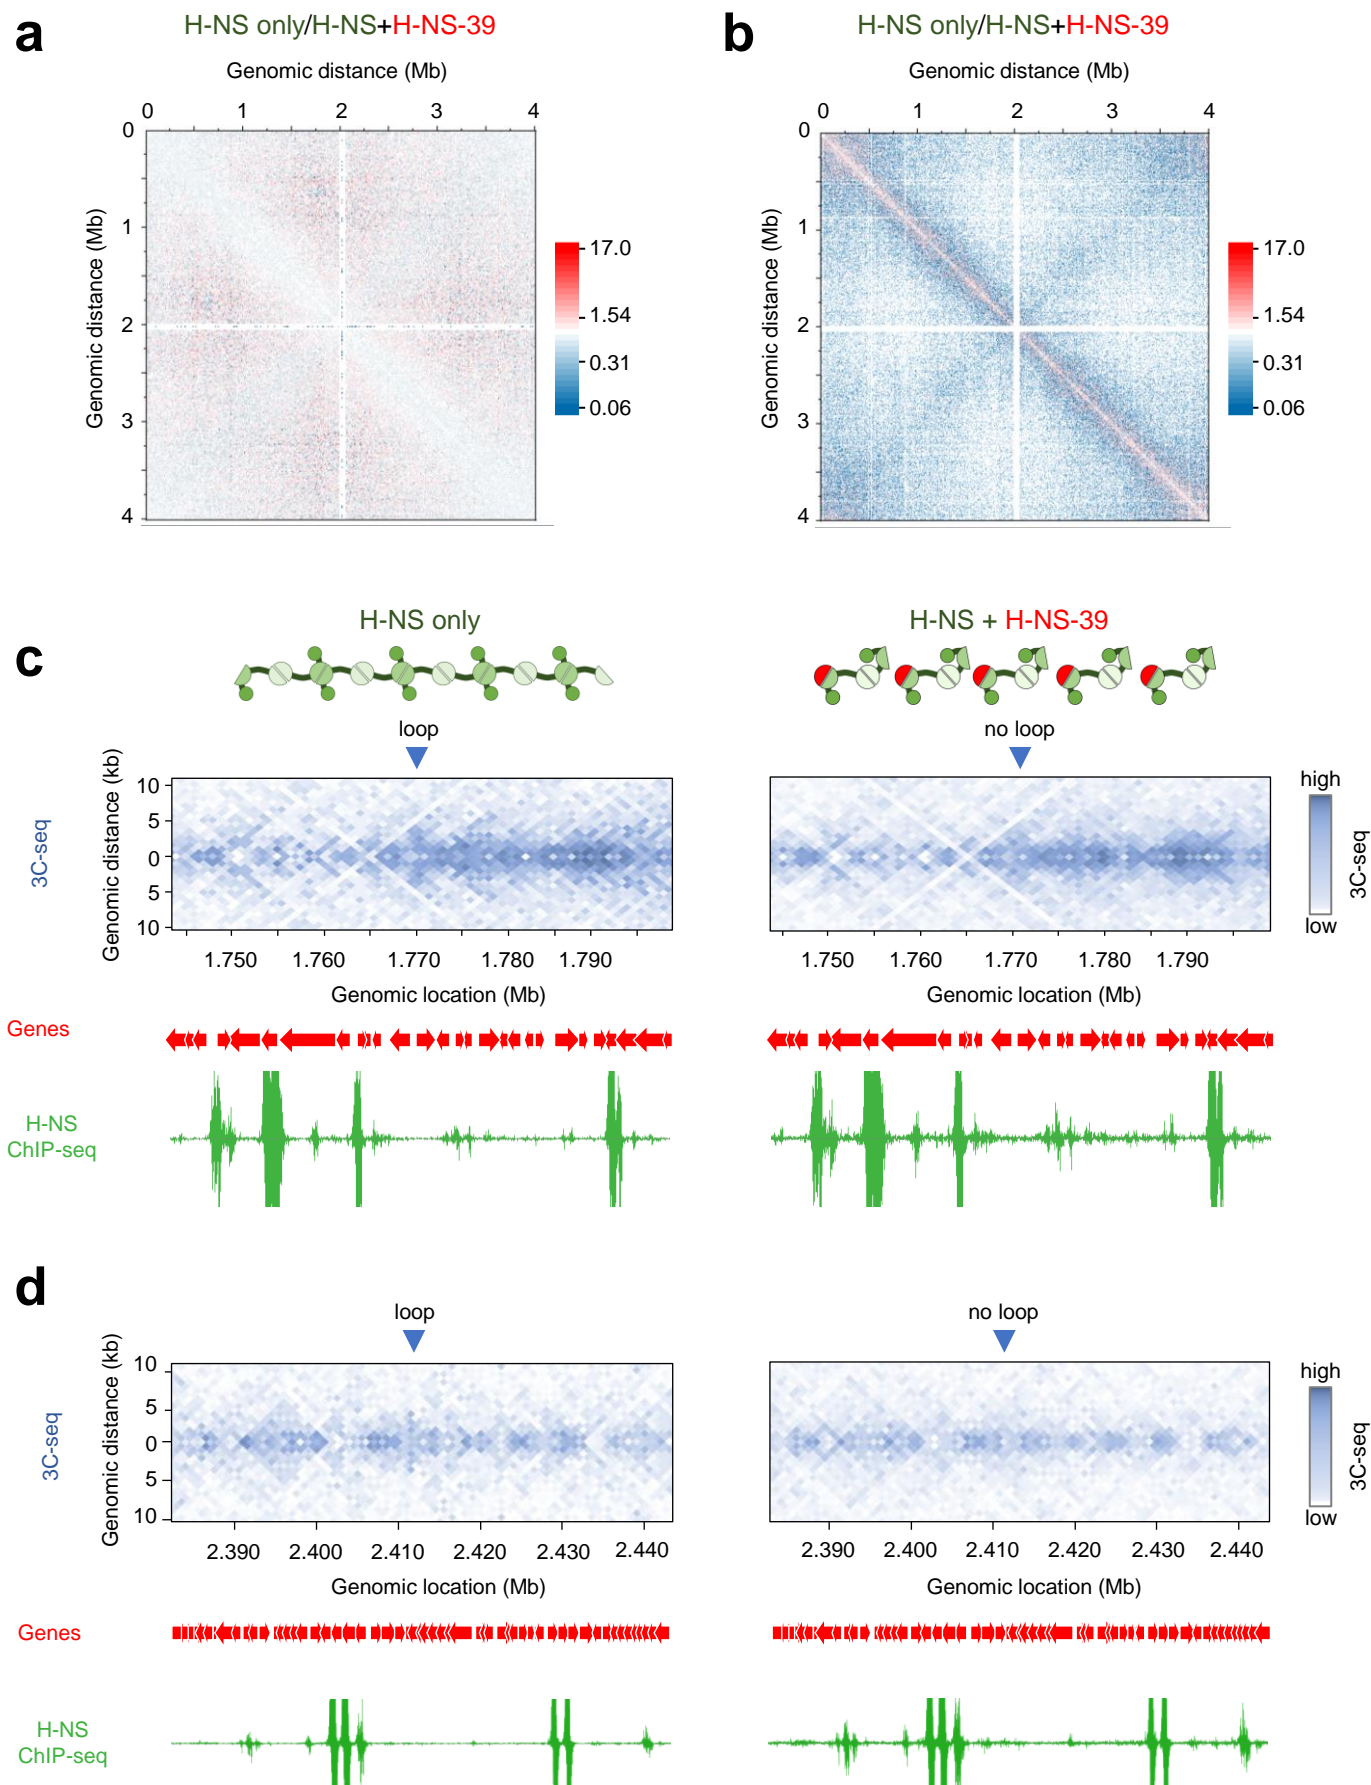

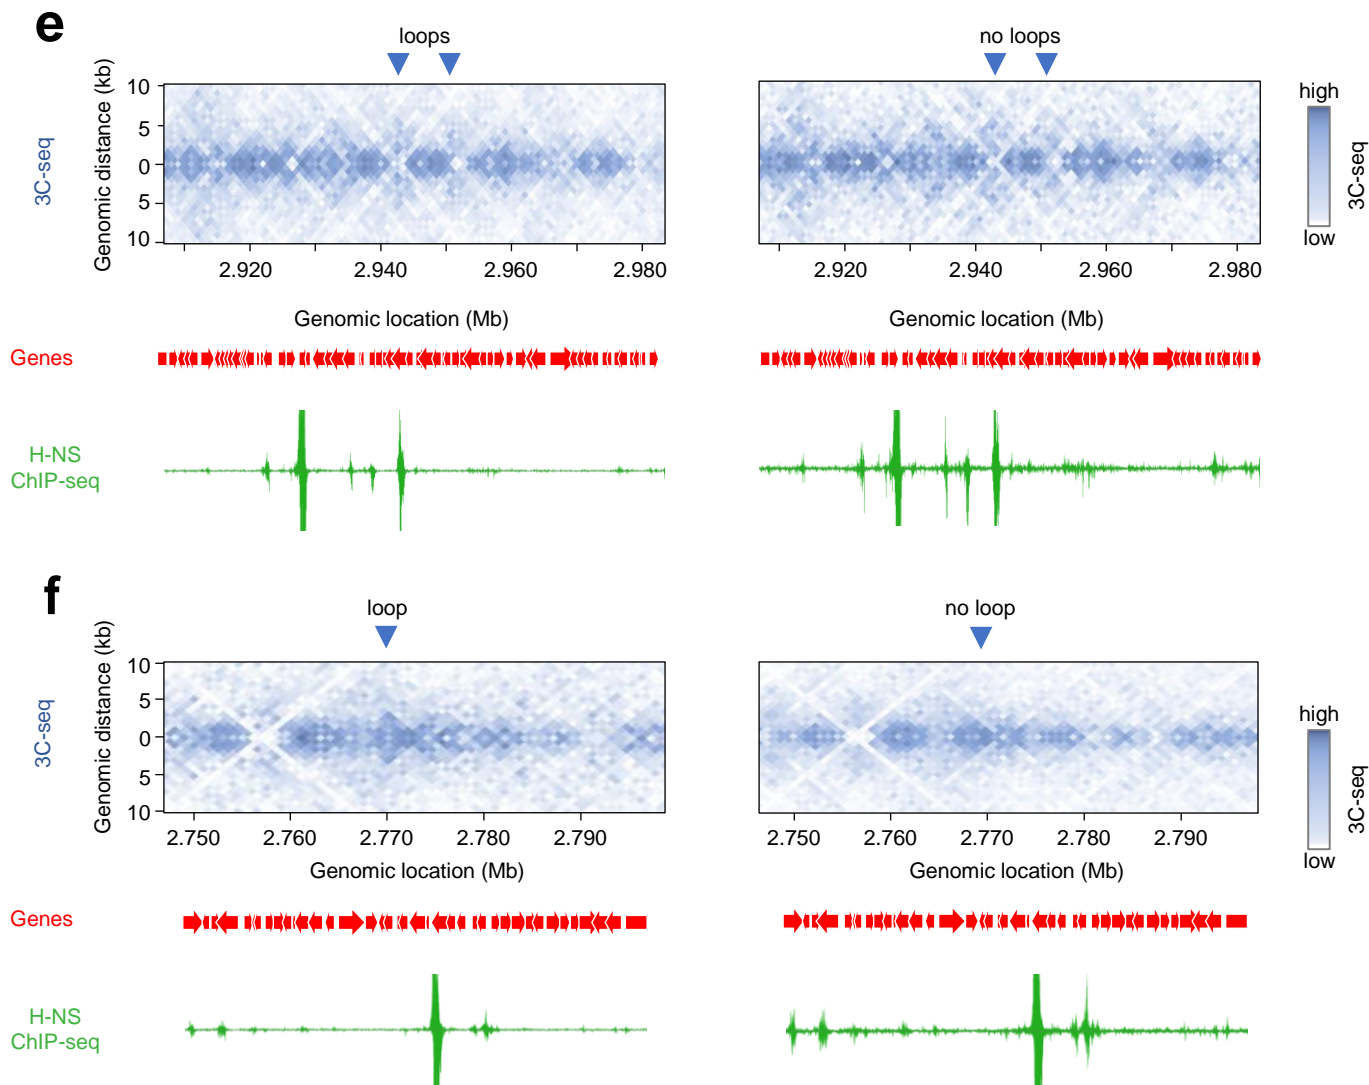

**Figure S5: Disruption of local DNA folding by H-NS-39 *in vivo*.**

**a. Changes to 10 kb resolution contact frequencies in the presence of H-NS-39.** The heatmap plots normalised 3C-seq contact frequencies, in cells without H-NS-39, divided by normalised contact frequencies from cells expressing H-NS-39. The contact ratios are grouped in 10 kb bins and axes indicate the genomic location of each bin in the pair.

**b. Changes to 1 kb resolution contact frequencies in the presence of H-NS-39.** As for the above panel except that values are binned at 1 kb resolution.

**c-f. Changes to local DNA folding patterns in the presence of H-NS-39.** In each panel, the heatmaps separately illustrate interaction frequencies between 1 kb sections of the *A. baumannii* chromosome, measured by 3C-seq, in the presence and absence of H-NS-39. An interaction pattern indicative of a loop is marked and signal in this region is lost in the presence of H-NS-39. The locations of genes (red arrows) are also shown alongside H-NS binding patterns determined by ChIP-seq with or without expression of H-NS-39.

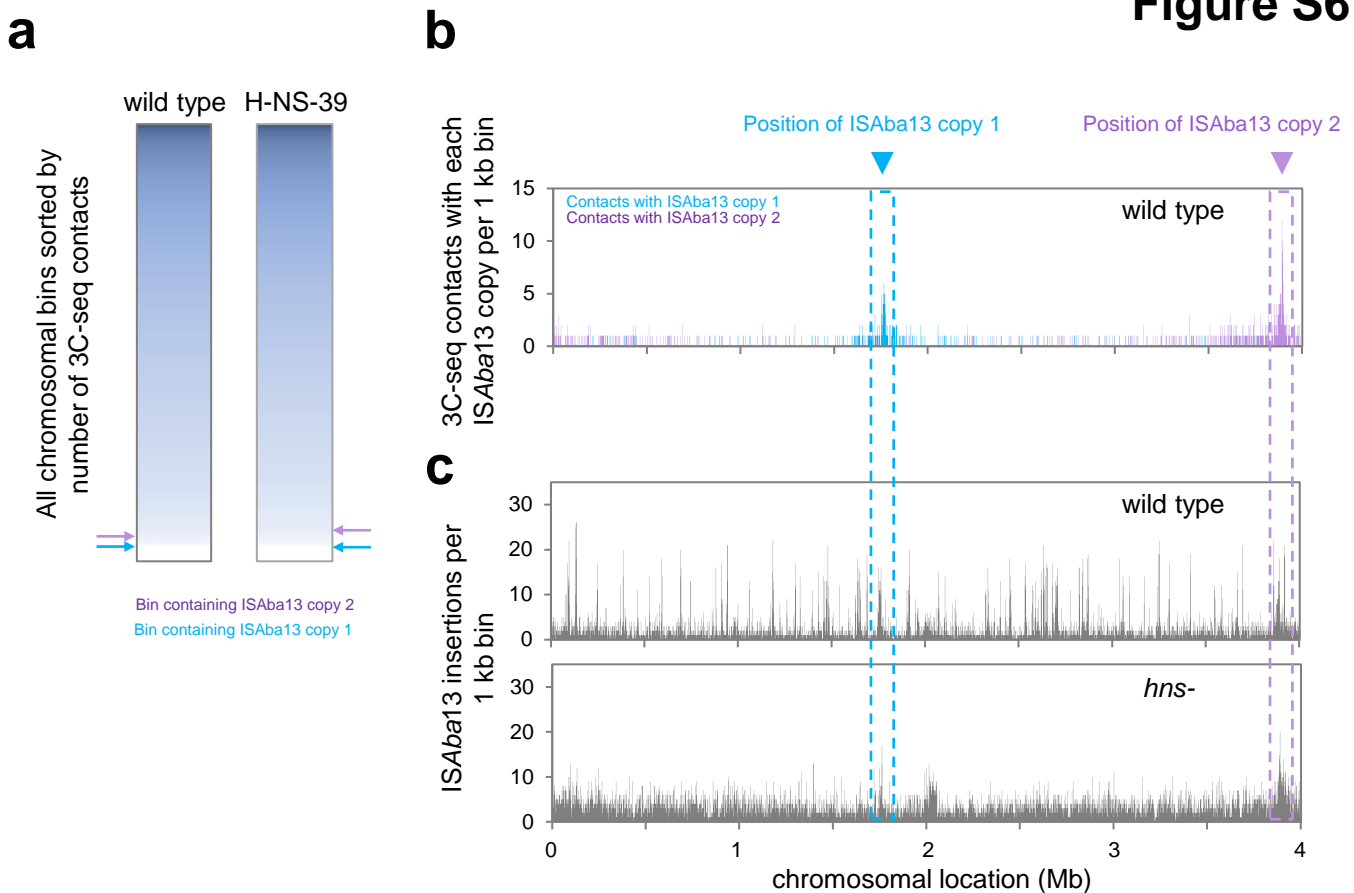

**Figure S6: Existing copies of ISAbA13 do not interact with hot spots for ISAbA13 transposition.**

**a. Existing copies of ISAbA13 are in poorly interactive regions of the chromosome.** The panel shows two heatmaps, each representing the *A. baumannii* chromosome divided into 1 kb sections. Sections are coloured according to the number of 3C-seq interactions and sorted on this basis, rather than by chromosomal position. Sections containing existing copies of ISAbA13 are labelled.

**b. Location and frequency of 3C-seq interactions involving ISAbA13 at chromosomal positions 1.764 Mb (copy 1) and 3.863 Mb (copy 2).** The bar chart shows the frequency of interactions between each 1 kb chromosomal section and ISAbA13 copy 1 (cyan) or copy 2 (purple). Each ISAbA13 copy primarily interacts with neighbouring DNA regions but not sites elsewhere in the genome. Source data are provided as a Source Data file.

**c. Location and frequency of ISAbA13 insertions in the presence and absence of H-NS.** The bar charts show the frequency of ISAbA13 insertions, in each 1 kb chromosomal bin, in the presence and absence of H-NS. In wild type cells, there are many hotspots for transposition that are H-NS bound regions. Comparison with panel b shows that these transposition hotspots do not interact with either copy of ISAbA13. In the absence of H-NS, the two regions of highest ISAbA13 transposition surround copies 1 and 2 of the insertion sequence at their starting chromosomal loci. Source data are provided as a Source Data file.



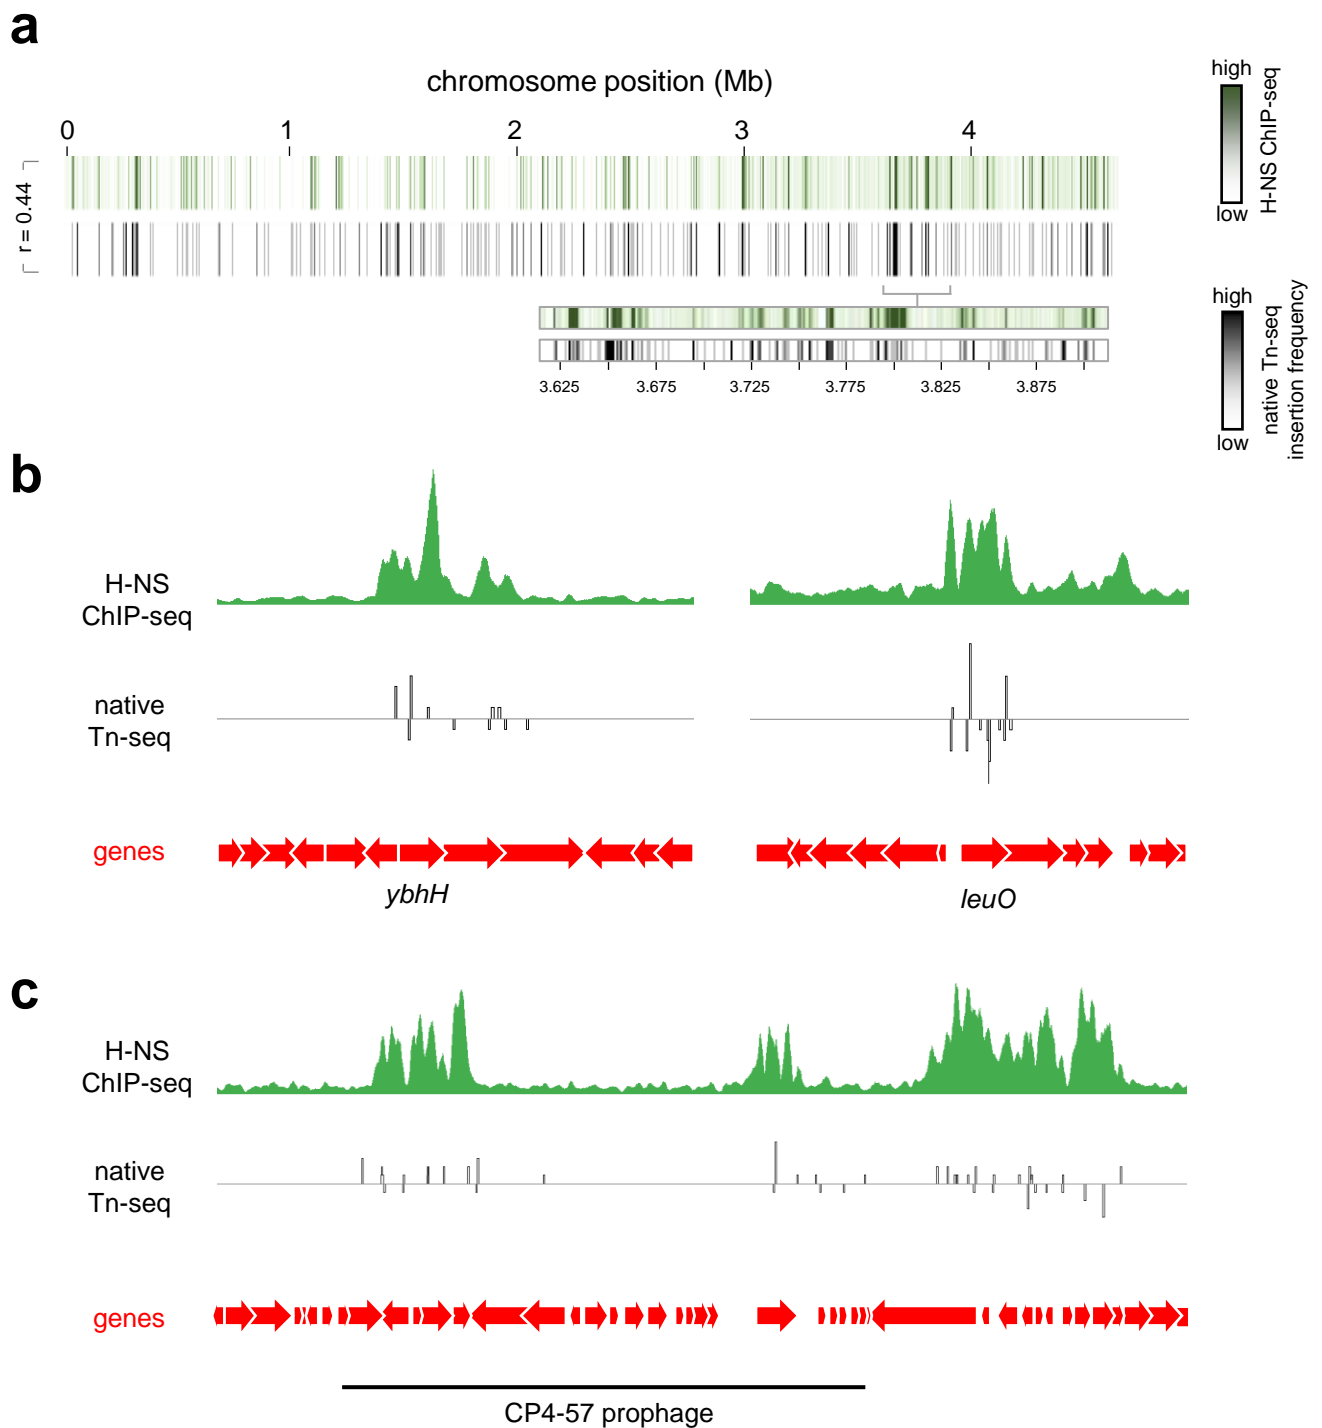

**Figure S7: Insertion sequence *insH3* is targeted to H-NS bound DNA in *E. coli*.**

**a. Global patterns of H-NS binding and *insH3* transposition are correlated.** The panel shows two heatmaps, each representing the *E. coli* MG1655 chromosome divided into 1 kb sections. Sections are coloured according to the H-NS ChIP-seq binding signal (top) or the number of *insH3* insertions detected using native Tn-seq for wild type (bottom). The heatmap expansions are provided to aid comparison of H-NS binding and insertion frequency. The Pearson correlation coefficient ( $r$ ) of the two datasets is shown.

**b. Examples of H-NS mediated *insH3* capture.** Selected chromosomal regions with H-NS ChIP-seq and native Tn-seq data shown. In both cases, traces indicate read depths with positive and negative values corresponding to the top and bottom DNA strand respectively. Genes are shown as arrows.

**c. H-NS targets *insH3* to prophage in *E. coli*.** The panel shows the chromosomal region encompassing the CP4-57 prophage (marked by a solid black line). The phage genome contains two H-NS bound regions and both are targeted by *insH3*.

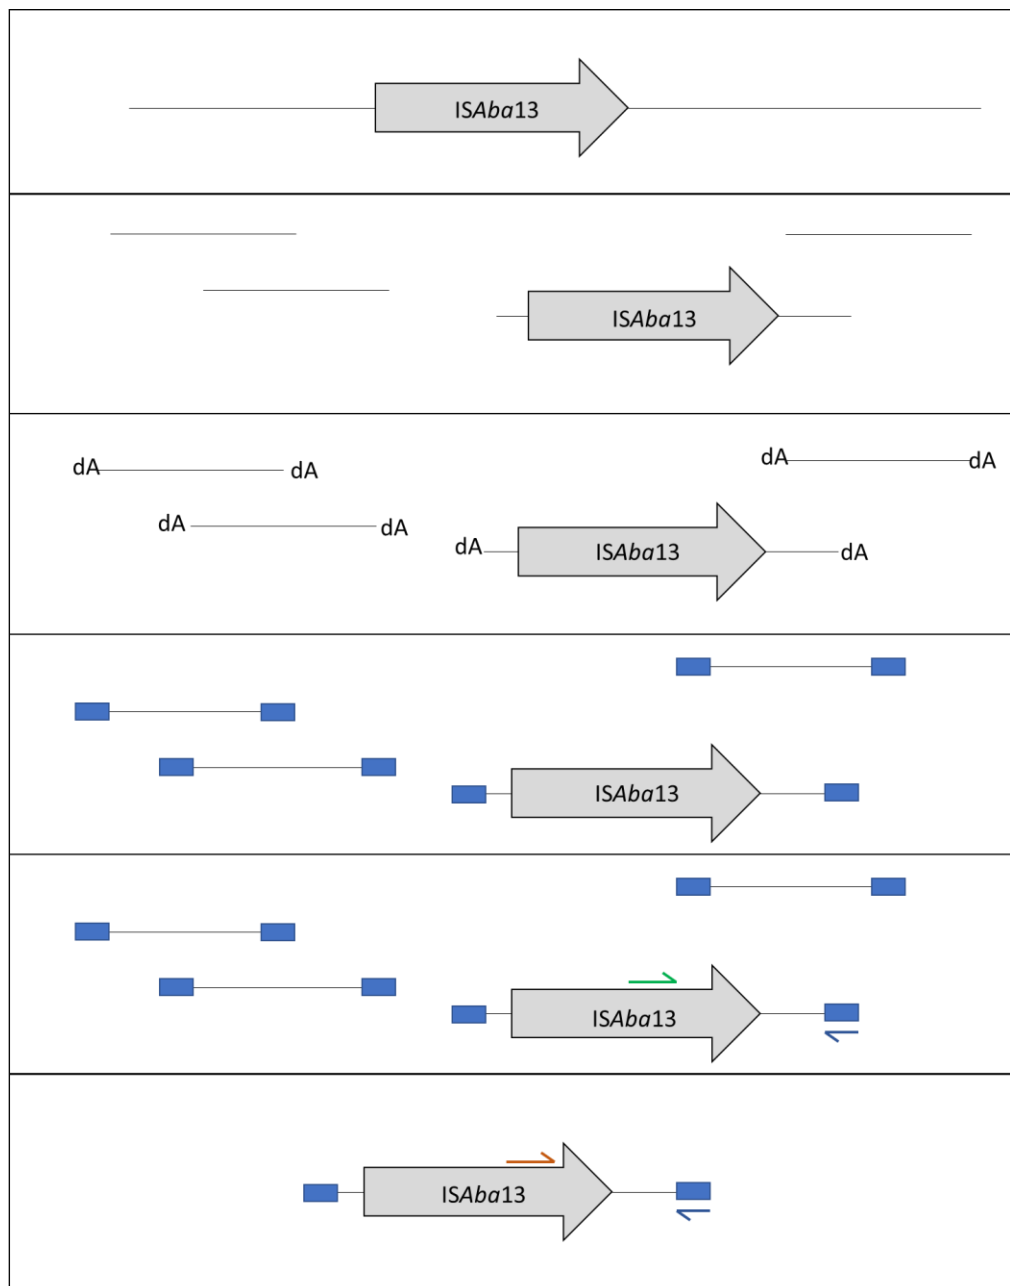

**Figure S8: Schematic representation of the native Tn-seq method.** Genomic DNA (gDNA) is sheared using treatment with dsDNA fragmentase. Following end repair and dA-tailing, adaptors are ligated on. This is followed by a PCR using a primer specific for the adaptor (blue arrow) and a primer complementary to the end of *ISAbA13* (green arrow). To increase specificity, a second hemi-nested PCR is done with the same adaptor primer and a primer complementary to *ISAbA13* further downstream from the previous primer binding site. This is to ensure that only genuine *ISAbA13*::chromosome junctions are detected.

**Table S1:** Changes in gene expression in grey colony derivatives compared to wild types cells

| <b>Locus</b>                | <b>Name</b>   | <b>Function</b>        | <b>Log<sub>2</sub> fold change</b> | <b>P value<sup>1</sup></b> |
|-----------------------------|---------------|------------------------|------------------------------------|----------------------------|
| <i>Up regulated genes</i>   |               |                        |                                    |                            |
| ABUW_1703                   |               | hypothetical protein   | 2.41                               | 9.21E-03                   |
| ABUW_2112                   |               | DUF2726 domain protein | 2.41                               | 2.29E-02                   |
| ABUW_1766                   | <i>ISAb13</i> | insertion sequence     | 2.14                               | 1.14E-09                   |
| ABUW_3803                   | <i>ISAb13</i> | insertion sequence     | 2.07                               | 3.78E-09                   |
| <i>Down regulated genes</i> |               |                        |                                    |                            |
| ABUW_2006                   |               | major capsid protein   | -2.12                              | 5.09E-06                   |
| ABUW_2017                   |               | major capsid protein   | -2.25                              | 1.87E-04                   |
| ABUW_2028                   |               | major capsid protein   | -2.54                              | 2.80E-07                   |
| ABUW_1769                   |               | PEGA domain protein    | -2.80                              | 2.37E-06                   |
| ABUW_3823                   | <i>weeI</i>   | sugar transferase      | -2.94                              | 1.82E-11                   |
| ABUW_1641                   |               | hypothetical protein   | -3.25                              | 1.35E-05                   |
| ABUW_3822                   | <i>weeH</i>   | acetyl transferase     | -3.43                              | 2.08E-13                   |
| ABUW_0304                   | <i>pilA</i>   | pilin                  | -5.49                              | 1.22E-31                   |

<sup>1</sup>Calculated using an exact test.

**Table S2:** Mobile genetic elements containing transposition hotspots dependent on H-NS

| <b>Mobile element</b>                | <b>Chromosomal position</b> | <b>Genes with H-NS dependent transposition hotspots</b> |
|--------------------------------------|-----------------------------|---------------------------------------------------------|
| <i>Chromosomal elements</i>          |                             |                                                         |
| Aeromonas phage SW69-9               | 318756-329326               | 0                                                       |
| Escherichia phage vB_EcoM_ECO1230-10 | 545886-581029               | 1                                                       |
| Acinetobacter phage Bphi-B1251       | 736407-769903               | 3                                                       |
| Acinetobacter phage Bphi-B1251       | 776101-793726               | 0                                                       |
| Acinetobacter phage Bphi-B1251       | 1289765-1330967             | 6                                                       |
| Acinetobacter phage Bphi-B1251       | 1314667-1338244             | 2                                                       |
| Acinetobacter phage Ab105-2phi       | 1391199-1409865             | 0                                                       |
| Acinetobacter phage Ab105-2phi       | 1393236-1416423             | 0                                                       |
| Enterobacteria phage Ike             | 1985246-2029746             | 1                                                       |
| Acinetobacter phage Ab105-1phi       | 2650307-2669540             | 7                                                       |
| Moraxella phage Mcat16               | 3031838-3049068             | 1                                                       |
| <i>Extra chromosomal elements</i>    |                             |                                                         |
| 83.61 kb plasmid                     | N.A.                        | 18                                                      |
| 8.73 kb plasmid                      | N.A.                        | 2                                                       |
| 1.97 kb plasmid                      | N.A.                        | 0                                                       |

**Table S3: Strains and plasmids**

| Name                                    | Description                                                                                                                                                                                       | Source    |
|-----------------------------------------|---------------------------------------------------------------------------------------------------------------------------------------------------------------------------------------------------|-----------|
| <b><i>A. baumannii</i> strains</b>      |                                                                                                                                                                                                   |           |
| AB5075                                  | Highly virulent and drug resistant isolate from an osteomyelitis tibial infection.                                                                                                                | (3)       |
| AB5075:: <i>gtr52</i> ::IS <i>Aba13</i> | Naturally occurring “grey” AB5075 derivative with an insertion sequence disrupting the <i>gtr52</i> gene.                                                                                         | This work |
| AB5075:: <i>ompW</i> ::IS <i>Aba13</i>  | Derivative of AB5075 with an insertion sequence disrupting the <i>ompW</i> gene, generated by scarless genome editing.                                                                            | This work |
| AB5075 <i>hns</i> ::T26                 | Derivative of AB5075 with a T26 transposon inserted at position 211 of <i>hns</i> . Tet <sup>R</sup> .                                                                                            | (4)       |
| <b><i>E. coli</i> strains</b>           |                                                                                                                                                                                                   |           |
| JCB387                                  | Used for general plasmid DNA manipulation. $\Delta$ <i>nirB</i> $\Delta$ <i>lac</i> .                                                                                                             | (5)       |
| DH5 $\alpha$                            | Used for general plasmid DNA manipulation. <i>fhuA2</i> $\Delta$ ( <i>argF-lacZ</i> )U169 <i>phoA glnV44</i> $\Phi$ 80 $\Delta$ ( <i>lacZ</i> )M15 <i>gyrA96 recA1 relA1 endA1 thi-1 hsdR17</i> . | NEB       |
| T7 Express                              | Used to overexpress <i>A. baumannii</i> H-NS from pJ414.                                                                                                                                          | NEB       |
| MG1655                                  | Used for native Tn-seq analysis of <i>insH3</i> .                                                                                                                                                 | (6)       |
| <b>Plasmids</b>                         |                                                                                                                                                                                                   |           |
| pVRL1Z                                  | High copy number plasmid, contains <i>parE2-paaA2</i> toxin-antitoxin system. Zeo <sup>R</sup> . Used to express H-NS-39 in <i>A. baumannii</i> .                                                 | (7)       |
| pVLR2Z                                  | High copy number plasmid, contains <i>parE2-paaA2</i> toxin-antitoxin system. Zeo <sup>R</sup> . Has an arabinose inducible promoter.                                                             | (7)       |
| pMHL-2                                  | Template for PCR used to make DNA fragments for genome editing. Contains <i>apraR</i> :: <i>sacB</i> counter selection and resistance cassette.                                                   | (8)       |
| pJ414                                   | Used to overexpress <i>A. baumannii</i> H-NS in <i>E. coli</i> .                                                                                                                                  | ATUM      |

**Table S4:** Oligonucleotides

| Name                                                        | Description                                                                                                  | Sequence (5' to 3')                                        |
|-------------------------------------------------------------|--------------------------------------------------------------------------------------------------------------|------------------------------------------------------------|
| <b>for generation of <i>ompW</i>::IS<i>Aba</i>13</b>        |                                                                                                              |                                                            |
| P5                                                          | To amplify <i>aprAR</i> :: <i>sacB</i> cassette                                                              | cgactcactatagggcgaattggccgctttccagtcgggaaacctg             |
| P6                                                          | To amplify <i>aprAR</i> :: <i>sacB</i> cassette                                                              | catatgccaccgaccgagcaaaccgccagggtttcccagtcacgac             |
| P62                                                         | To create fragment 1                                                                                         | cagcagtcacataatagatagc                                     |
| P63                                                         | To create fragment 1                                                                                         | ggcccaattgcacctatagtgagtcgattggcaagtaaaattggg              |
| P64                                                         | To create fragment 2                                                                                         | gggtttgctcgggtcggtgccatagggctttgtgcacaagatttaaaag          |
| P65                                                         | To create fragment 2                                                                                         | attggcaagggtttgtgcacaacctatctc                             |
| P66                                                         | To create fragment 3                                                                                         | caacaaagcccttgccaattaccagca                                |
| P71                                                         | To create fragment 3                                                                                         | cgttatgcgcaatgtccagt                                       |
| P70                                                         | To amplify Gibson assembly product                                                                           | taagccatcaagcaaagtgag                                      |
| P74                                                         | To amplify Gibson assembly product and create fragment used in second recombination                          | ctcagagctaataagtgactg                                      |
| P72                                                         | For creating fragment used in second recombination                                                           | ccgtactacctctacacggt                                       |
| P157                                                        | For creating fragment used in second recombination                                                           | acttgccaatggctttgtgcacaagatttaaagttaag                     |
| P158                                                        | For creating fragment used in second recombination                                                           | caacaaagccattggcaagtaaaattggg                              |
| <b>for generation of <i>hns</i>-3x-FLAG</b>                 |                                                                                                              |                                                            |
| prSL1                                                       | To create fragments 1 and 5                                                                                  | ggctattaattgctgagcaagctttg                                 |
| prSL11                                                      | To create fragment 2                                                                                         | ggtgcaaaacttgaagatttctaactgctactgactacaagaccatgac          |
| prSL12                                                      | To create fragment 2                                                                                         | gactgggaaaaccctggcgttactgtcatcctctgtaacg                   |
| prSL13                                                      | To create fragment 1                                                                                         | caccgtcatggctttgtagttagcgcgattaagaatctcaagttttgcacc        |
| prSL14                                                      | To create fragment 3                                                                                         | cgattacaaggatgacgatgacaagtaacgccagggtttcccagtc             |
| prSL23                                                      | To create fragment 6                                                                                         | gattacaaggatgacgatgacaagtaattgtattgcctcttaaaaagccaagcg     |
| prSL24                                                      | To create fragment 5                                                                                         | cgcttggcttttaagaggcaatacaattactgtcatcgtcatccttgaatc        |
| prSL3                                                       | To create fragment 4                                                                                         | ggtttcccactggaaagcgttattgcctcttaaaaagccaagcgattc           |
| prSL4                                                       | To create fragments 4 and 5                                                                                  | gtggacgttgatgattcaataaagcc                                 |
| prSL6                                                       | To create fragment 3                                                                                         | cgcttggcttttaagaggcaatacaacgctttccagtcgggaaacc             |
| prSL9                                                       | To amplify Gibson assembly product                                                                           | gcaactagccaacaactcaaaaacc                                  |
| prSL10                                                      | To amplify Gibson assembly product                                                                           | gtgtatggtcatcactgtaccac                                    |
| <b>for cloning <i>A. baumannii hns</i> in pJ414</b>         |                                                                                                              |                                                            |
| P129                                                        | To amplify codon optimised AB5075 <i>hns</i> for cloning in pJ414. <i>Nde</i> I restriction site underlined. | gcaagccat <u>at</u> gaaccggacattagc                        |
| P146                                                        | To amplify codon optimised AB5075 <i>hns</i> for cloning in pJ414. <i>Xho</i> I restriction site underlined. | gcaggtctc <u>gag</u> ttaaatcaggaaatc                       |
| <b>for constructing <i>hns</i>-39 and cloning in pVRL1Z</b> |                                                                                                              |                                                            |
| P134                                                        | To create fragment 1, <i>Xho</i> I site underlined                                                           | ccccctc <u>gag</u> ataaatattaagaaaatattacaattataattactaatg |
| P135                                                        | To create fragment 1                                                                                         | tgatctttttcattaataaatactccagctttac                         |
| P136                                                        | To create fragment 2                                                                                         | tttattaatgaaaaaatcaagcaatcg                                |
| P137                                                        | To create fragment 2, <i>Pst</i> I underlined                                                                | cgggct <u>cgag</u> tattgtttttcttactgttttg                  |
| <b>for <i>in vitro</i> DNA bridging assays</b>              |                                                                                                              |                                                            |
| P162                                                        | To create IS <i>Aba</i> 13 bait fragment                                                                     | biotin-cttattaatggctttgttcac                               |
| P163                                                        | To create IS <i>Aba</i> 13 bait fragment                                                                     | taatttaataaggctttgttcac                                    |

|      |                              |                      |
|------|------------------------------|----------------------|
| P171 | To create T6SS prey fragment | caacacaactttcattcc   |
| P172 | To create T6SS prey fragment | agggtatctatatacagcca |

**for native Tn-seq with *A. baumannii***

|                      |                                                                                                                           |                                                                                                                |
|----------------------|---------------------------------------------------------------------------------------------------------------------------|----------------------------------------------------------------------------------------------------------------|
| Adapter 1.2          | Anneals with adapter 2.2                                                                                                  | taccacgacca-NH <sub>2</sub>                                                                                    |
| Adapter 2.2          | Anneals with adapter 1.2                                                                                                  | atgatggccggtggattgtgtggtcgtggtat                                                                               |
| JelAP1               | For 1st PCR, binds adapter 2.2 sequence                                                                                   | atgatggccggtggattgtg                                                                                           |
| IS <i>Aba</i> 13_out | For 1st PCR, binds near to the 5'end of IS <i>Aba</i> 13                                                                  | caaagccaagtcaatgagattcatgc                                                                                     |
| Staggered_1          | For 2nd hemi-nested PCR of P5 end, binding site to IS <i>Aba</i> 13 underlined. T in italic added for heterogeneity.      | aatgatagcggcaccaccgagatctacacttttccttacacgacgctcttccgatc <u>g</u><br><u>accacataccccgagttgtcac</u>             |
| Staggered_2          | For 2nd hemi-nested PCR of P5 end, binding site to IS <i>Aba</i> 13 underlined. Ts in italic added for heterogeneity.     | aatgatagcggcaccaccgagatctacacttttccttacacgacgctcttccgatc <u>tt</u><br><u>gaccacataccccgagttgtcac</u>           |
| Staggered_3          | For 2nd hemi-nested PCR of P5 end, binding site to IS <i>Aba</i> 13 underlined. TGATA in italic added for heterogeneity.  | aatgatagcggcaccaccgagatctacacttttccttacacgacgctcttccgatc<br><u>tgatagaccacataccccgagttgtcac</u>                |
| Staggered_4          | For 2nd hemi-nested PCR of P5 end, binding site to IS <i>Aba</i> 13 underlined. TATCTA in italic added for heterogeneity. | aatgatagcggcaccaccgagatctacacttttccttacacgacgctcttccgatc<br><u>tatctagaccacataccccgagttgtcac</u>               |
| AP1_P7_tagged_1      | For 2nd hemi-nested PCR of P7 end, binding site to adaptor underlined. Barcode: CGTGAT in italic.                         | caagcagaagacggcatacagagat <u>atcac</u> ggtgactggagttcagacgtgtgctctt<br><u>ccgatctgtcaatgatggccggtggatttgtg</u> |
| AP1_P7_tagged_2      | For 2nd hemi-nested PCR of P7 end, binding site to adaptor underlined. Barcode: ACATCG in italic.                         | caagcagaagacggcatacagagat <u>cgatgt</u> gactggagttcagacgtgtgctctt<br><u>ccgatctgtcaatgatggccggtggatttgtg</u>   |
| AP1_P7_tagged_3      | For 2nd hemi-nested PCR of P7 end, binding site to adaptor underlined. Barcode: GCCTAA in italic.                         | caagcagaagacggcatacagagat <u>taggc</u> gtgactggagttcagacgtgtgctctt<br><u>ccgatctgtcaatgatggccggtggatttgtg</u>  |
| AP1_P7_tagged_4      | For 2nd hemi-nested PCR of P7 end, binding site to adaptor underlined. Barcode: TGGTCA in italic.                         | caagcagaagacggcatacagagat <u>gaccag</u> tgactggagttcagacgtgtgctctt<br><u>ccgatctgtcaatgatggccggtggatttgtg</u>  |
| AP1_P7_tagged_5      | For 2nd hemi-nested PCR of P7 end, binding site to adaptor underlined. Barcode: CACTGT in italic.                         | caagcagaagacggcatacagagat <u>acagt</u> ggtgactggagttcagacgtgtgctctt<br><u>ccgatctgtcaatgatggccggtggatttgtg</u> |
| AP1_P7_tagged_6      | For 2nd hemi-nested PCR of P7 end, binding site to adaptor underlined. Barcode: ATTGGC in italic.                         | caagcagaagacggcatacagagat <u>ccaat</u> gtgactggagttcagacgtgtgctctt<br><u>ccgatctgtcaatgatggccggtggatttgtg</u>  |
| AP1_P7_tagged_7      | For 2nd hemi-nested PCR of P7 end, binding site to adaptor underlined. Barcode: CATAGC in italic.                         | caagcagaagacggcatacagagat <u>gctat</u> ggtgactggagttcagacgtgtgctctt<br><u>ccgatctgtcaatgatggccggtggatttgtg</u> |
| AP1_P7_tagged_8      | For 2nd hemi-nested PCR of P7 end, binding site to adaptor underlined. Barcode: CTAGCT in italic.                         | caagcagaagacggcatacagagat <u>gctag</u> gtgactggagttcagacgtgtgctctt<br><u>ccgatctgtcaatgatggccggtggatttgtg</u>  |
| AP1_P7_tagged_9      | For 2nd hemi-nested PCR of P7 end, binding site to adaptor underlined. Barcode: TTCGAC in italic.                         | caagcagaagacggcatacagagat <u>gcaag</u> tgactggagttcagacgtgtgctctt<br><u>ccgatctgtcaatgatggccggtggatttgtg</u>   |
| AP1_P7_tagged_10     | For 2nd hemi-nested PCR of P7 end, binding site to adaptor underlined. Barcode: CTCGTA in italic.                         | caagcagaagacggcatacagagat <u>acag</u> gtgactggagttcagacgtgtgctctt<br><u>ccgatctgtcaatgatggccggtggatttgtg</u>   |

**for native Tn-seq with *E. coli***

|                   |                                                      |                            |
|-------------------|------------------------------------------------------|----------------------------|
| <i>insH3</i> _out | For 1st PCR, binds near to the 5'end of <i>insH3</i> | gataacgccttaaatggcgaagaaac |
|-------------------|------------------------------------------------------|----------------------------|



Staggered\_1 For 2nd hemi-nested PCR of P5 end, aatgatacggcgaccaccgagatctacactcttcctacacgacgctcttccgatc*tg*  
binding site to *insH3* underlined. ggagaaaaaatcggctcaaacatg  
T in italic added for heterogeneity.

Staggered\_2 For 2nd hemi-nested PCR of P5 end, aatgatacggcgaccaccgagatctacactcttcctacacgacgctcttccgatc*tt*  
binding site to *insH3* underlined. gggagaaaaaatcggctcaaacatg  
Ts in italic added for heterogeneity.

Staggered\_3 For 2nd hemi-nested PCR of P5 end, aatgatacggcgaccaccgagatctacactcttcctacacgacgctcttccgatc  
binding site to *insH3* underlined. tgatagggagaaaaaatcggctcaaacatg  
TGATA in italic added for  
heterogeneity.

Staggered\_4 For 2nd hemi-nested PCR of P5 end, aatgatacggcgaccaccgagatctacactcttcctacacgacgctcttccgatc  
binding site to *insH3* underlined. tatctagggagaaaaaatcggctcaaacatg  
TATCTA in italic added for  
heterogeneity.

## SUPPLEMENTARY REFERENCES

1. van der Valk, R. A. *et al.* Mechanism of environmentally driven conformational changes that modulate H-NS DNA-Bridging activity. *Elife* **6**, e27369 (2017).
2. Abramson, J. *et al.* Accurate structure prediction of biomolecular interactions with AlphaFold 3. *Nature* **630**, 493–500 (2024).
3. Jacobs, A.C., Thompson, M.G., Black, C.C., Kessler, J.L., Clark, L.P., McQueary, C.N., Gancz, H.Y., Corey, B.W., Moon, J.K., Si, Y., *et al.* (2014) AB5075, a highly virulent isolate of *Acinetobacter baumannii*, as a model strain for the evaluation of pathogenesis and antimicrobial treatments. *MBio*, **5**.
4. Gallagher, L.A., Ramage, E., Weiss, E.J., Radey, M., Hayden, H.S., Held, K.G., Huse, H.K., Zurawski, D. V., Brittnacher, M.J. and Manoil, C. (2015) Resources for genetic and genomic analysis of emerging pathogen *Acinetobacter baumannii*. *J. Bacteriol.*, **197**, 2027–2035.
5. Page, L., Griffiths, L. and Cole, J.A. (1990) Different physiological roles of two independent pathways for nitrite reduction to ammonia by enteric bacteria. *Arch. Microbiol.*, **154**, 349–354.
6. Blattner, F.R., Plunkett, G., Bloch, C.A., Perna, N.T., Burland, V., Riley, M., Collado-Vides, J., Glasner, J.D., Rode, C.K., Mayhew, G.F., *et al.* (1997) The complete genome sequence of *Escherichia coli* K-12. *Science*, **277**, 1453–62.
7. Lucidi, M., Visaggio, D., Prencipe, E., Imperi, F., Rampioni, G., Cincotti, G., Leoni, L. and Visca, P. (2019) New Shuttle Vectors for Real-Time Gene Expression Analysis in Multidrug-Resistant *Acinetobacter* Species: In Vitro and In Vivo Responses to Environmental Stressors. *Appl. Environ. Microbiol.*, **85**.
8. Godeux, A.S., Svedholm, E., Lupo, A., Haenni, M., Venner, S., Laaberki, M.H. and Charpentier, X. (2020) Scarless Removal of Large Resistance Island *AbaR* Results in Antibiotic Susceptibility and Increased Natural Transformability in *Acinetobacter baumannii*. *Antimicrob. Agents Chemother.*, **64**.
