# Supplementary material for: H-NS is a bacterial transposon capture protein
Source: PubMed Central journal article supplement (PMC11335895; doi:10.1038/s41467-024-51407-5), 2024-08-20
Supplement: 41467_2024_51407_MOESM3_ESM.pdf [file 41467_2024_51407_MOESM3_ESM.pdf]

## **Description of Additional Supplementary Files:**

**Supplementary Data 1:** ChIP-seq read depths

**Supplementary Data 2:** 3C-seq contact matrices

**Supplementary Data 3:** 3C-seq explorable heatmaps with aligned ChIP-seq data

**Supplementary Data 4:** 3C-seq explorable heatmaps with H-NS-39 expression and aligned ChIP-seq data

**Supplementary Data 5:** ISAbA13 insertion sites
